# Supplementary material for: Storing, linking, and mining microarray databases using SRS
Source: PubMed Central journal article supplement (PMC1187877; doi:10.1186/1471-2105-6-192), 2005-07-27
Supplement: 1471-2105-6-192-S1.pdf [file 1471-2105-6-192-S1.pdf]

# Auto-Upload Tool Manual

Version 12 (July 20, 2005)

Antoine Veldhoven / Don de Lange / Guido Jenster  
Department of Urology, Erasmus MC, Rotterdam  
[d.delange@erasmusmc.nl](mailto:d.delange@erasmusmc.nl)  
[g.jenster@erasmusmc.nl](mailto:g.jenster@erasmusmc.nl)  
<http://www.erasmusmc.nl/gatcplatform>

The Auto-Upload Tool has been published in BMC Bioinformatics (Veldhoven et al. 2005). For latest version of software and manual, please visit: <http://www.erasmusmc.nl/gatcplatform>

# Contents

|                                                    |    |
|----------------------------------------------------|----|
| Introduction.....                                  | 3  |
| Creating a data file.....                          | 4  |
| Explanation of the data file.....                  | 5  |
| Considerations.....                                | 6  |
| Using the Auto-Upload Tool.....                    | 7  |
| Adding a new database.....                         | 8  |
| Change subsection location of database in SRS..... | 10 |
| Create a link to other databases.....              | 11 |
| Setting user access.....                           | 12 |
| Adding a database description.....                 | 12 |
| Defining a standard database view.....             | 13 |
| Make the dataset available in SRS.....             | 14 |
| Delete a dataset from SRS.....                     | 15 |
| Manage uploaded datasets.....                      | 15 |
| Nomenclature rules Erasmus MC SRS users.....       | 16 |

## Introduction

The Auto-Upload Tool is a PHP-written program which allows the upload of databases into a local SRS server. SRS (Sequence Retrieval System) is a database system developed to store, link and query different types of biological databases (such as UniGene, SwissProt, MedLine, Ensembl, OMIM, LocusLink, GO, etc.). The main reason for building the Auto-Upload Tool was to allow SRS users to automatically upload microarray datasets into SRS.

Uploading datasets via the Auto-Upload Tool into SRS is a two-step process. First, the dataset is uploaded into a user-owned directory on the server, which can be viewed using "Manage Databases". Second, the uploaded dataset needs to be adapted for its import into SRS, including steps to link the dataset, determine its section location, defining a standard view and setting user access.

The Auto-Upload Tool is locally available to Erasmus MC SRS users via the GATC Platform portal. This manual is specifically written for the Erasmus MC Auto-Upload Tool installation.

For researchers outside the Erasmus MC, the program can be downloaded for local installation (<http://www.erasmusmc.nl/gatcplatform/>). Setting up a local version of the Auto-Upload Tool needs to be done by an SRS administrator.

Minimal requirements include:

- A local system of SRS (version 7.1.3)
- A DQS batch-queue
- A MySQL database server
- A PHP-enabled Webserver (like Apache)

## Creating a data file

The Auto-upload Tool expects a specific format of the data file in order to correctly insert the dataset into the SRS system. The data file must be a text (Tab delimited) file (.txt).

Please take a good look at the example database (Figure 1) below and take note of the Explanation of the data file, the locations and especially the “accepted characters / values”.

|    | A             | B        | C            | D                      | E                                 | F           | G          | H               | I          | J               | K         |
|----|---------------|----------|--------------|------------------------|-----------------------------------|-------------|------------|-----------------|------------|-----------------|-----------|
| 1  | DEMO_DATABASE |          |              |                        |                                   |             |            |                 |            |                 |           |
| 2  | MAD           |          |              |                        |                                   |             |            |                 |            |                 |           |
| 3  |               |          |              |                        |                                   |             |            |                 |            |                 |           |
| 4  | CBCR-T Index  | Clone ID | Accession ID | NORMAL Average Fig 1c8 | NORMAL Standard Deviation Fig 1c8 | 1c8 BPH Ave | 1c8 BPH SD | 1c8 PCA Average | 1c8 PCA SD | 1c8 MET Average | 1c8 MET S |
| 5  | str           | str      | str          | real                   | real                              | real        | real       | real            | real       | real            | real      |
| 6  | 2-7-21-23     | 362278   | AA001219     | 0.04                   | 0.21                              | 0.07        | 0.15       | -0.4            | 0.5        | -0.03           | 0.27      |
| 7  | 2-4-23-14     | 427893   | AA001369     | 0.03                   | 0.18                              | -0.2        | 0.31       | 0.02            | 0.39       | -0.08           | 0.21      |
| 8  | 2-12-15-14    | 427895   | AA001360     | -0.12                  | 0.11                              | -0.08       | 0.22       | 0.06            | 0.25       | 0.2             | 0.28      |
| 9  | 2-15-22-20    | 361899   | AA001376     | 0.24                   | 0.36                              | 0.09        | 0.57       | -0.18           | 0.21       | -0.29           | 0.22      |
| 10 | 2-15-11-20    | 362059   | AA001432     | 0.08                   | 0.19                              | -0.18       | 0.25       | -0.36           | 0.27       | -0.51           | 0.37      |
| 11 | 2-8-9-25      | 361943   | AA001444     | 0.06                   | 0.26                              | 0.1         | 0.26       | -0.73           | 0.42       | -1.25           | 0.44      |
| 12 | 2-8-9-1       | 361943   | AA001444     | 0.13                   | 0.24                              | 0.15        | 0.25       | -0.65           | 0.3        | -0.9            | 0.44      |
| 13 | 2-15-16-3     | 361974   | AA001449     | 0.11                   | 0.55                              | 0.3         | 0.38       | -0.44           | 0.57       | -1.2            | 0.51      |
| 14 | 2-16-10-15    | 427799   | AA001604     | -0.27                  | 0.37                              | -0.54       | 0.29       | -0.14           | 0.44       | -0.15           | 0.49      |
| 15 | 2-14-15-14    | 427806   | AA001611     | -0.11                  | 0.19                              | -0.25       | 0.24       | -0.17           | 0.22       | -0.01           | 0.22      |
| 16 | 2-4-24-3      | 427812   | AA001614     | 0.29                   | 0.12                              | 0.07        | 0.29       | 0.1             | 0.21       | 0.24            | 0.4       |
| 17 | 2-9-18-14     | 427811   | AA001639     | -0.06                  | 0.19                              | -0.03       | 0.2        | 0.06            | 0.13       | 0.23            | 0.26      |
| 18 | 2-12-13-14    | 428056   | AA001658     | 0.02                   | 0.16                              | 0.12        | 0.23       | 0.2             | 0.29       | 0.34            | 0.31      |
| 19 | 2-6-24-17     | 428083   | AA001672     | -0.31                  | 0.26                              | -0.23       | 0.23       | -0.14           | 0.2        | 0.01            | 0.19      |
| 20 | 2-10-7-18     | 428192   | AA001712     | -0.19                  | 0.19                              | -0.21       | 0.16       | -0.32           | 0.29       | -0.15           | 0.25      |
| 21 | 2-3-23-14     | 428005   | AA001718     | -0.24                  | 0.26                              | -0.38       | 0.36       | -0.31           | 0.27       | 0.09            | 0.22      |
| 22 | 2-3-17-18     | 428223   | AA001749     | 0.01                   | 0.2                               | 0.09        | 0.16       | -0.16           | 0.25       | -0.36           | 0.49      |
| 23 | 2-10-15-19    | 427980   | AA001835     | 0.31                   | 0.18                              | 0.21        | 0.52       | 0.21            | 0.23       | 0.2             | 0.42      |
| 24 | 2-13-16-19    | 427982   | AA001839     | 0.1                    | 0.3                               | 0.02        | 0.29       | 0.03            | 0.17       | 0.14            | 0.29      |
| 25 | 2-15-10-15    | 427996   | AA001841     | -0.37                  | 0.18                              | -0.36       | 0.18       | -0.18           | 0.17       | 0.08            | 0.34      |
| 26 | 2-9-20-13     | 428006   | AA001845     | -0.31                  | 0.18                              | -0.21       | 0.19       | -0.04           | 0.16       |                 | 0.19      |
| 27 | 2-3-11-16     | 428166   | AA001870     | 0.21                   | 0.25                              | 0.42        | 0.32       | 0.43            | 0.38       | 0.09            | 0.18      |
| 28 | 2-9-16-14     | 428169   | AA001876     | -0.33                  | 0.21                              | -0.18       | 0.15       | -0.19           | 0.16       | -0.17           | 0.2       |
| 29 | 2-6-17-17     | 427697   | AA001884     | -0.14                  | 0.17                              | -0.1        | 0.23       | -0.21           | 0.2        | 0.05            | 0.17      |
| 30 | 2-6-21-18     | 427750   | AA001897     | 0.13                   | 0.14                              | 0.18        | 0.17       | 0.12            | 0.21       | 0.38            | 0.23      |
| 31 | 2-11-3-17     | 427861   | AA001918     | 0.26                   | 0.12                              | 0.11        | 0.19       | 0.17            | 0.25       | 0.1             | 0.25      |
| 32 | 2-11-15-14    | 427877   | AA001950     | 0.01                   | 0.21                              | -0.3        | 0.21       | -0.2            | 0.19       | -0.12           | 0.2       |
| 33 | 2-8-25-14     | 427909   | AA001970     | -0.11                  | 0.34                              | -0.36       | 0.5        | -0.28           | 0.35       | -0.05           | 0.22      |
| 34 | 2-8-2-15      | 427930   | AA001976     | -0.19                  | 0.28                              | -0.27       | 0.43       | -0.24           | 0.43       | -0.07           | 0.3       |
| 35 | 2-2-22-14     | 427931   | AA001983     | 0.41                   | 0.16                              | 0.24        | 0.35       | 0.14            | 0.15       | 0.13            | 0.16      |
| 36 | 2-4-19-14     | 428136   | AA002006     | 0.17                   | 0.16                              | -0.21       | 0.31       | -0.09           | 0.17       | 0.02            | 0.33      |
| 37 | 2-7-3-15      | 428048   | AA002061     | 0.15                   | 0.11                              | 0.02        | 0.26       | -0.06           | 0.2        | 0.13            | 0.23      |
| 38 | 2-8-6-15      | 428074   | AA002069     |                        | 0.25                              | 0.17        | 0.18       | 0.08            | 0.23       | 0.48            | 0.34      |
| 39 | 2-1-13-16     | 428067   | AA002072     | -0.45                  | 0.24                              | -0.5        | 0.32       | -0.53           | 0.24       | -0.69           | 0.42      |
| 40 | 2-10-5-19     | 428124   | AA002091     | 0.04                   | 0.13                              | 0.03        | 0.18       | -0.12           | 0.2        | 0.19            | 0.18      |
| 41 | 2-10-21-12    | 428231   | AA002126     | -0.11                  | 0.22                              | -0.05       | 0.32       | -0.05           | 0.47       |                 | 0.29      |
| 42 | 2-8-4-16      | 427657   | AA002153     | 0.15                   | 0.15                              | 0.18        | 0.19       | 0.04            | 0.3        | 0.3             | 0.26      |
| 43 | 2-2-3-14      | 427692   | AA002162     | -0.32                  | 0.13                              | -0.19       | 0.25       | -0.03           | 0.24       | 0.13            | 0.21      |
| 44 | 2-2-3-15      | 427767   | AA002207     | 0.53                   | 0.36                              | 0.3         | 0.29       | 0.05            | 0.31       | -0.19           | 0.54      |
| 45 | 2-8-11-13     | 429222   | AA004210     | 0.17                   | 0.27                              | 0.32        | 0.35       | 0.39            | 0.47       | 0.14            | 0.39      |
| 46 | 2-8-3-15      | 429225   | AA004224     | -0.11                  | 0.14                              | -0.09       | 0.24       | 0.02            | 0.22       | 0.29            | 0.18      |
| 47 | 2-14-21-14    | 429243   | AA004274     | 0.07                   |                                   | 0.11        | 0.38       | -0.08           | 0.41       | -0.15           | 0.44      |
| 48 | 2-14-22-17    | 429035   | AA004320     | 0.14                   | 0.13                              | 0.22        | 0.14       | 0.2             | 0.19       | 0.43            | 0.24      |

Figure 1: Example data file

## ***Explanation of the data file***

Please remember that in fields with descriptions (see below) only letters, numbers and the underscore ( \_ ) are allowed. **Never start with a number.** Do not include special characters in the description (~!@#\$\$%^&\*()-+=[]{};:”' <>?/\, etc.).

DATABASE NAME (this will be displayed in the SRS system)

|                     |                                                |
|---------------------|------------------------------------------------|
| Location            | <b>CELL A1</b>                                 |
| Accepted characters | Numbers, Letters and ' _ '                     |
| Note                | This name must be a unique name in the system. |

DATABASE GROUP (this is the short name of the (sub)section in the SRS system)

|                     |                                       |
|---------------------|---------------------------------------|
| Location            | <b>CELL A2</b>                        |
| Accepted characters | Numbers, Letters and ' _ '            |
| Note                | May be left empty and filled in later |

UNIQUE COLUMN NAME

|                     |                                                 |
|---------------------|-------------------------------------------------|
| Location            | <b>Row # 3</b>                                  |
| Accepted characters | Numbers, Letters and ' _ '                      |
| Note                | Should be left empty, is automatically inserted |

DESCRIPTIVE COLUMN NAME

|                     |                            |
|---------------------|----------------------------|
| Location            | <b>Row # 4</b>             |
| Accepted characters | Numbers, Letters and ' _ ' |

DATA TYPE

|                 |                                                                                                                                  |
|-----------------|----------------------------------------------------------------------------------------------------------------------------------|
| Location        | <b>Row # 5</b>                                                                                                                   |
| Accepted values | <b>int</b> number (e.g. 21356 or -135636)<br><b>real</b> floating point (e.g. -1.392 or 1.425)<br><b>str</b> String, text values |
| Note            | If left empty, type is set to real                                                                                               |

DATA

|                 |                            |
|-----------------|----------------------------|
| Location        | <b>Row # 6</b> and onwards |
| Accepted values | anything goes              |

## ***Considerations***

- Do not include units in the data file (like %, ng/ml etc).
- Since SRS is not designed to perform calculations on the datasets, it is best to upload fully processed data, i.e. normalized, flagged and statistically evaluated ratios of microarray experiments. You can also include the raw data, like intensities, to filter for genes with an expression higher or lower than a specific intensity value.
- Gene expression ratios should be in a 2log format. Two-fold higher expression (ratio 2) will be displayed as “1”; two-fold lower expression (ratio 0.5) as “-1”; no differential expression (ratio 1) as “0”.
- Determine up-front the nomenclature of the text-variables such as database name, database group, and descriptive column names. If every researcher makes up his/her own classification, the SRS system quickly becomes a confusing mess. At the end of this manual, the “Nomenclature rules Erasmus MC SRS users” are explained.

## Using the Auto-Upload Tool

Go to: <http://www.erasmusmc.nl/gatcplatform/> and follow the link SRS and [Auto-Upload Tool](#).

The following window will open:



The screenshot shows a login window titled "SRS Database Editor". It features a blue header with a key icon. Below the header, there are two input fields: "User name:" with a dropdown arrow and a "Password:" field. A checkbox labeled "Remember my password" is located below the password field. At the bottom, there are "OK" and "Cancel" buttons.

Figure 2: GATC Platform – Auto-Upload Tool login

Please fill in your SRS username & password, supplied by the SRS administrator.

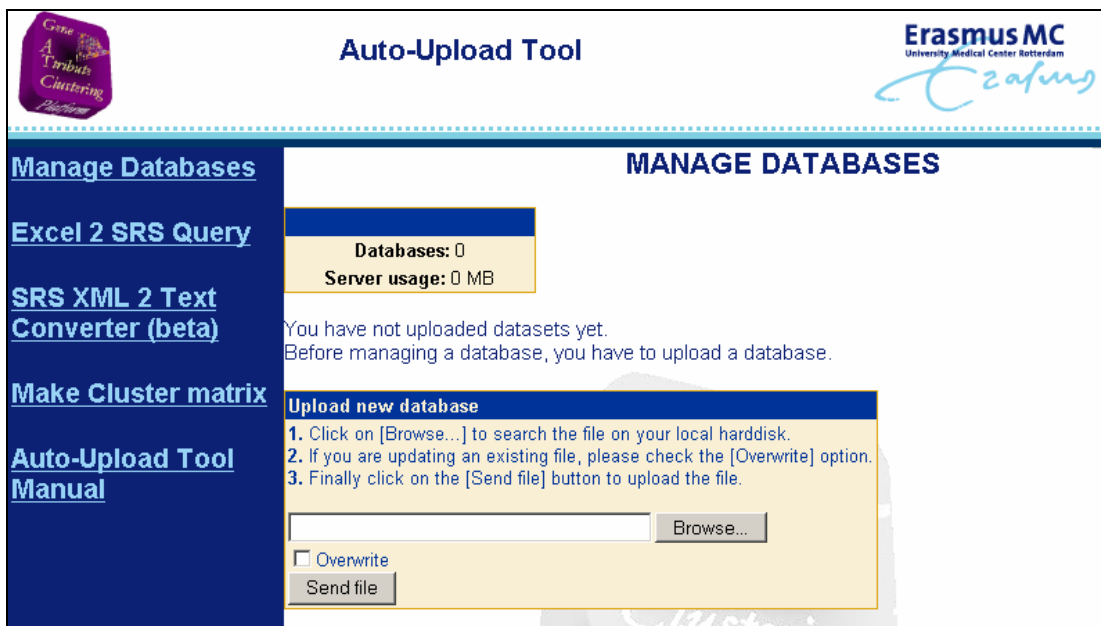

The screenshot shows the "Auto-Upload Tool" interface. The top header includes the "Auto-Upload Tool" title and the "Erasmus MC University Medical Center Rotterdam" logo. The main content area is titled "MANAGE DATABASES" and displays "Databases: 0" and "Server usage: 0 MB". A message states: "You have not uploaded datasets yet. Before managing a database, you have to upload a database." Below this, there is a section for "Upload new database" with three numbered instructions: 1. Click on [Browse...] to search the file on your local harddisk. 2. If you are updating an existing file, please check the [Overwrite] option. 3. Finally click on the [Send file] button to upload the file. The interface includes a "Browse..." button, an "Overwrite" checkbox, and a "Send file" button. A left sidebar contains navigation links: "Manage Databases", "Excel 2 SRS Query", "SRS XML 2 Text Converter (beta)", "Make Cluster matrix", "Auto-Upload Tool Manual", and "Manual".

Figure 3: Initial view Auto-Upload Tool

Once logged in, the above screen appears. All your manageable databases will be listed on this page, if this is the first time you are using the system, no databases will be available.

## Adding a new database

If this is the first time you are adding a database, the system will need some information from you, like an email address to communicate the results of your actions.

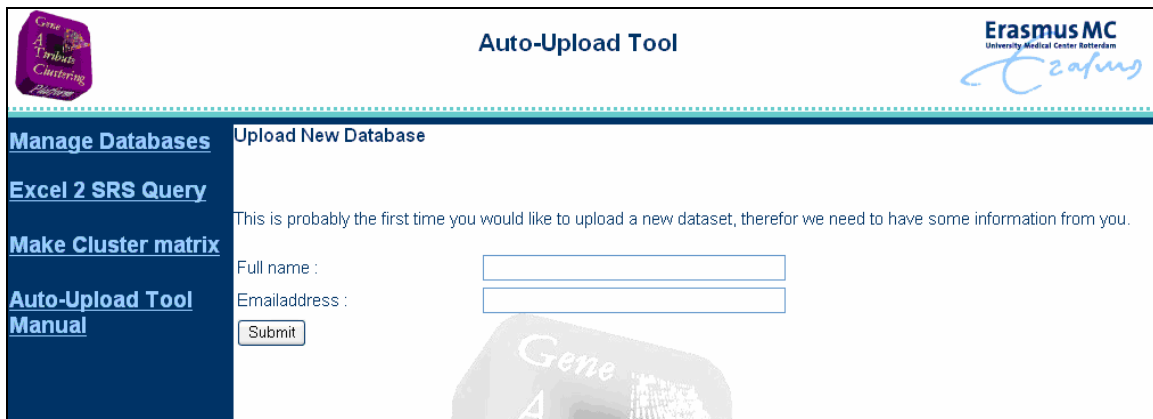

The screenshot shows the 'Auto-Upload Tool' interface. On the left is a navigation menu with links: 'Manage Databases', 'Excel 2 SRS Query', 'Make Cluster matrix', 'Auto-Upload Tool', and 'Manual'. The main content area is titled 'Upload New Database' and contains the text: 'This is probably the first time you would like to upload a new dataset, therefore we need to have some information from you.' Below this text are two input fields: 'Full name :' and 'Emailaddress :'. A 'Submit' button is located below the email address field. The Erasmus MC logo is visible in the top right corner.

Figure 4: Providing information to the system

Please fill in your name and email address in order to receive email regarding the status of your actions.

Once your details have been filled in, you can upload your database:

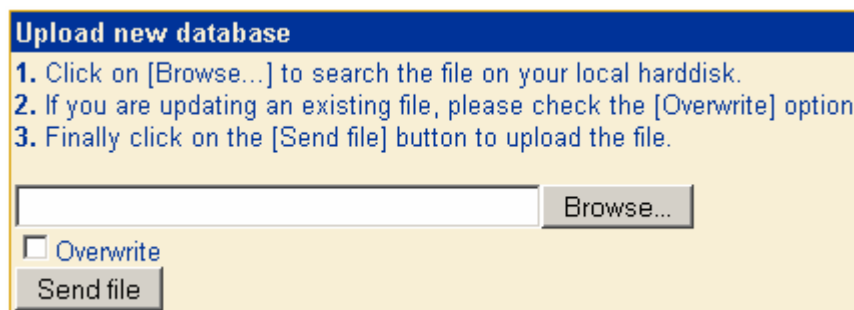

The screenshot shows the 'Upload new database' form. It contains three numbered instructions: 1. Click on [Browse...] to search the file on your local harddisk. 2. If you are updating an existing file, please check the [Overwrite] option. 3. Finally click on the [Send file] button to upload the file. Below the instructions is a text input field with a 'Browse...' button to its right. Below the input field is a checkbox labeled 'Overwrite' and a 'Send file' button.

Figure 5: Upload new database

In order to upload a new database, click on browse and locate the ".txt" tab-delimited data file.



**Auto-Upload Tool**

**Erasmus MC**  
University Medical Center Rotterdam

[Manage Databases](#)

[Excel 2 SRS Query](#)

[SRS XML 2 Text Converter \(beta\)](#)

[Make Cluster matrix](#)

[Auto-Upload Tool Manual](#)

**EDIT DATABASE**

Database: "testdatabase"  
Present in SRS: yes  
Database view: [Switch to full](#)

| TESTDATABASE                             |                                         |
|------------------------------------------|-----------------------------------------|
| MAD                                      |                                         |
| [ GenBank Accession (AAxxxx) (UNIGENE) ] | [ Select link ]                         |
| <input type="button" value="Set link"/>  | <input type="button" value="Set link"/> |
| TESTDATABASEAA                           | TESTDATABASEAB                          |
| Accession Code                           | Field002                                |
| str                                      | real                                    |
| AA426741                                 | 0.1                                     |
| AA426742                                 | 0.2                                     |
| AA426743                                 | 0.3                                     |
| AA426744                                 | 0.4                                     |
| ...                                      | ...                                     |
| AA426746                                 | 0.6                                     |
| AA426747                                 | 0.7                                     |
| AA426748                                 | 0.8                                     |
| AA426749                                 | 0.9                                     |
| AA426751                                 | 1                                       |

**Figure 6: Edit database**

This screen displays the database you have just uploaded.

You can click on any value or column name to change this value or name.

The uploaded database is placed on a user-owned section of the server. To view all uploaded databases, click on "Manage Databases".

## Change subsection location of database in SRS

Click on the entry in the second row, cell A2 (“MAD” in our example). This will open a new screen in which the subsection location of the database in SRS can be determined. Select the correct subsection and click “apply”.

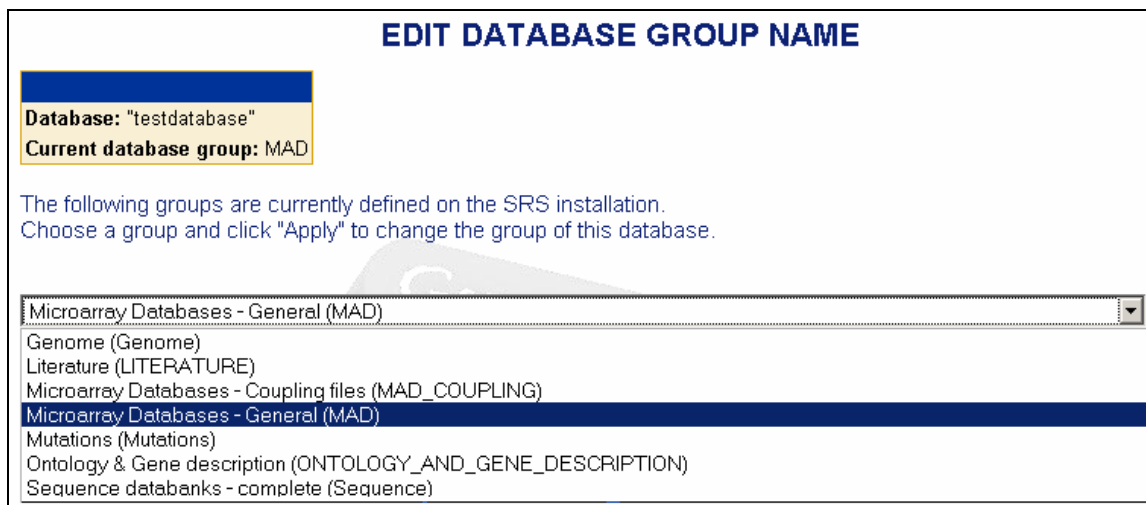

**EDIT DATABASE GROUP NAME**

**Database:** "testdatabase"  
**Current database group:** MAD

The following groups are currently defined on the SRS installation.  
Choose a group and click "Apply" to change the group of this database.

- Microarray Databases - General (MAD)
- Genome (Genome)
- Literature (LITERATURE)
- Microarray Databases - Coupling files (MAD\_COUPLING)
- Microarray Databases - General (MAD)
- Mutations (Mutations)
- Ontology & Gene description (ONTOLOGY\_AND\_GENE\_DESCRIPTION)
- Sequence databanks - complete (Sequence)

**Figure 7: Selecting the location of the database in the various SRS subsections**

It is essential to go through this location selection step. In case an incorrect or new subsection name is kept in cell A2, SRS will generate a new (sub)section with that particular name, disordering SRS with all kind of weird (sub)sections. In case one wants to create a new (sub)section for storing datasets, please contact the administrator first.

## Create a link to other databases

Scroll to the appropriate column of your database.

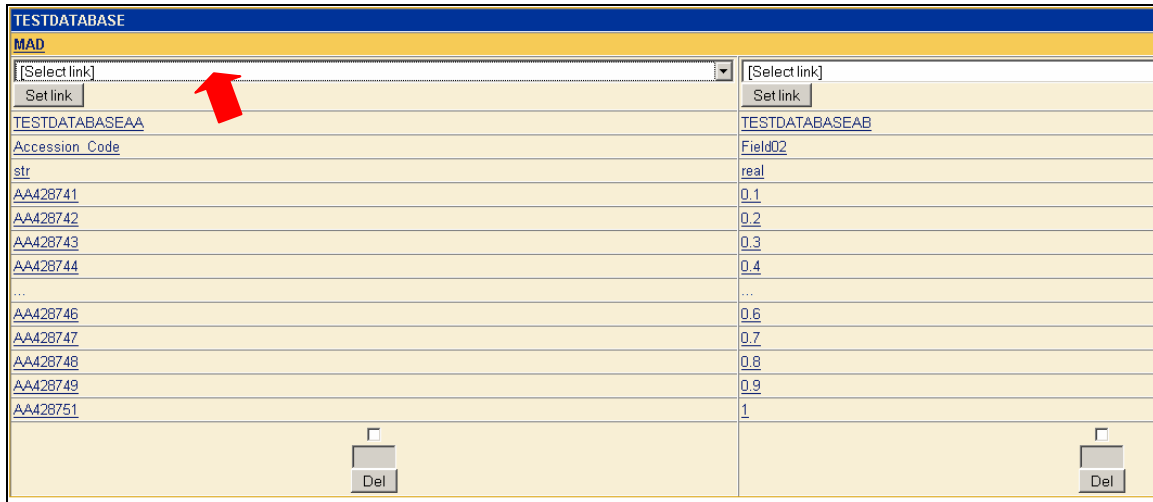

| TESTDATABASE             |                          |
|--------------------------|--------------------------|
| MAD                      |                          |
| [Select link]            | [Select link]            |
| Set link                 | Set link                 |
| TESTDATABASEAA           | TESTDATABASEAB           |
| Accession Code           | Field02                  |
| str                      | real                     |
| AA426741                 | 0.1                      |
| AA426742                 | 0.2                      |
| AA426743                 | 0.3                      |
| AA426744                 | 0.4                      |
| ...                      | ...                      |
| AA426746                 | 0.6                      |
| AA426747                 | 0.7                      |
| AA426748                 | 0.8                      |
| AA426749                 | 0.9                      |
| AA426751                 | 1                        |
| <input type="checkbox"/> | <input type="checkbox"/> |
| Del                      | Del                      |

Figure 8a: Linking to UniGene through GenBank accession number

And select the appropriate linking

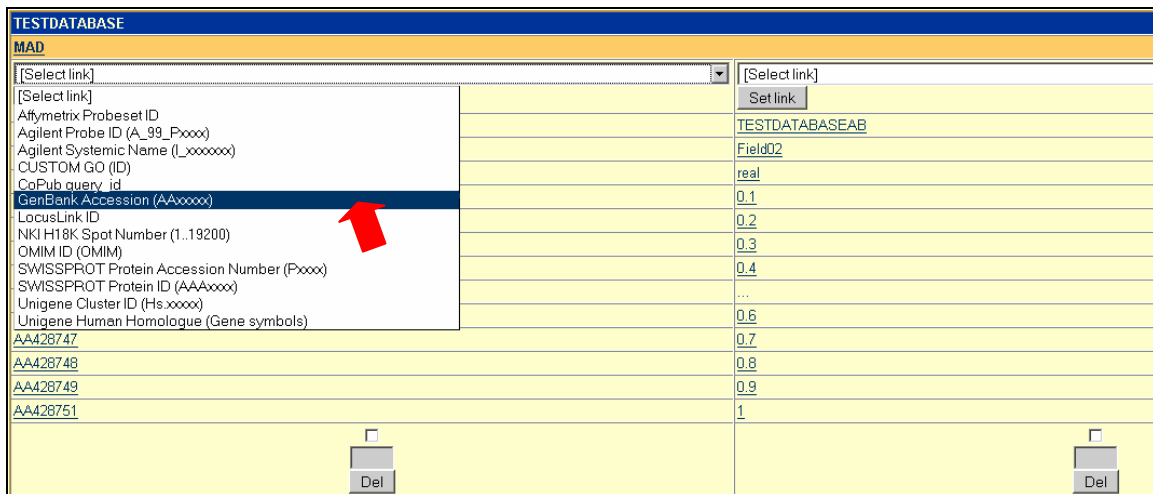

| TESTDATABASE                               |                          |
|--------------------------------------------|--------------------------|
| MAD                                        |                          |
| [Select link]                              | [Select link]            |
| [Select link]                              | Set link                 |
| Affymetrix Probeset ID                     | TESTDATABASEAB           |
| Agilent Probe ID (A_99_Pxxxx)              | Field02                  |
| Agilent Systemic Name (L_XXXXXX)           | real                     |
| CUSTOM GO (ID)                             | 0.1                      |
| CoPub query id                             | 0.2                      |
| GenBank Accession (AAxxxx)                 | 0.3                      |
| LocusLink ID                               | 0.4                      |
| NKI H18K Spot Number (1..19200)            | ...                      |
| OMIM ID (OMIM)                             | 0.6                      |
| SWISSPROT Protein Accession Number (Pxxxx) | 0.7                      |
| SWISSPROT Protein ID (AAxxxx)              | 0.8                      |
| Unigene Cluster ID (Hs.xxxxx)              | 0.9                      |
| Unigene Human Homologue (Gene symbols)     | 1                        |
| AA426747                                   |                          |
| AA426748                                   |                          |
| AA426749                                   |                          |
| AA426751                                   |                          |
| <input type="checkbox"/>                   | <input type="checkbox"/> |
| Del                                        | Del                      |

Figure 8b: Linking to UniGene through GenBank accession number

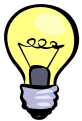

### IMPORTANT:

Be sure that you press the  - button each time you have changed a linked column in order to save the data.

One should not link different columns (such as GenBank\_Acc or UniGene\_ID) to the same database (such as UniGene). Only the last indexed link will be the one used by SRS to connect your uploaded dataset with the linked database!

## ***Setting user access***

In the [Permissions](#) section you can decide who will have access to the database. By default this will be ONLY you.

If you UNCHECK all users, the database will become publicly available, if you don't want to grant access to other users, please ONLY check yourself.

If the database was already uploaded into SRS, changes in permissions will automatically be implemented in SRS. It is not necessary to add the database again in SRS.

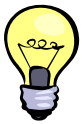

### **IMPORTANT:**

Be sure that you press the 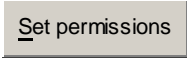 - button if you want to apply the permissions.

## ***Adding a database description***

The Auto-Upload Tool allows one to add a description of the dataset, which will be displayed in the SRS databank information field. The description is a text field and can be used to explain any details of the dataset. It is highly recommended to use this option to describe experimental conditions, explain abbreviations, give owner information, and more (Figure 9).

In addition to this text field, a single file can be uploaded which can be opened and viewed in the particular SRS databank information field. For example, the pdf version of the article describing the database or the grant describing the project can be attached.

Clicking the **“Save description data”** button will upload the text field and/or the attached file into the appropriate SRS databank information field. To add or adapt the text description or file, change the text or upload the new file and click the **“Save description data”** button. If the database was already uploaded into SRS, the description/file will be automatically replaced in SRS. It is not necessary to add the database again in SRS.

Textdb.txt'. At the bottom of the form is a 'Save description data' button."/>

**Description Data**

Add your description here:

Select a file to upload:

Current file: [Textdb.txt](#)

Save description data

**Figure 9: Adding text description and/or a single file to the database**

### ***Defining a standard database view***

It is possible to define a database view in SRS which is used when you are browsing entries or viewing search results. The Auto-Upload Tool allows you to edit this view and include any database field you want, including link fields to other (common) database fields such as LOCUSLINK, SWISSPROT, OMIM and UNIGENE.

Use the checkboxes to choose the fields you want to include in your standard view.

By clicking the “Set standard view” and “Remove standard view” buttons you can add and remove the standard database view settings to and from SRS. There is no need to add the database again to SRS when changing these settings.

### Standard View

Select the fields you want to add to the standard database view.  
The links of foreign fields must be set first in order to work properly.

#### Foreign fields

- LOCUSLINK Identifier
- LOCUSLINK RefSeq Accession Identifier
- OMIM Identifier
- SWISSPROT Identifier
- UNIGENE Gene Symbol
- UNIGENE Gene Name
- UNIGENE Identifier

#### testdatabase

- Accession\_Code
- Field02

Figure 10: Defining a standard SRS view for the database

## ***Make the dataset available in SRS***

On the bottom of the page you will find the “**Add xxx to SRS**”-button. By clicking this button, the database will be added into SRS. If the database already exists in SRS, the add-to-SRS action will overwrite the old database.

Emails will keep you informed on the performed actions and their results. Please report problems to your administrator.

Changes made to user access, the standard view, the database description, or attached file will be implemented upon clicking the appropriate buttons (“Set permissions” and “Save description data”). There is no need to again add the database to SRS (“Add xxx to SRS”). Any other changes made to the database (such as its name, SRS subsection, changing linking, changing or adding data) must be implemented by clicking the “Add xxx to SRS” button.

## Delete a dataset from SRS

On the bottom of the page you will find the “Delete xxx from SRS”-button. By clicking this button, the database will be deleted from SRS. The database will not be deleted from the Auto-Upload Tool “Manage Database” section and can easily be uploaded into SRS again following the procedure described above.

## Manage uploaded datasets

In the “Manage Databases” view, one can upload new datasets (see “Adding a new database”) and manage the uploaded datasets (Figure 11).

| Legend                                                      |                                           | Options                                                       |                    |         |       |           |             |
|-------------------------------------------------------------|-------------------------------------------|---------------------------------------------------------------|--------------------|---------|-------|-----------|-------------|
|                                                             | = Current SRS information                 | <a href="#">Hide SRS info</a>                                 |                    |         |       |           |             |
|                                                             | = Auto-Upload Tool information            | <a href="#">View a list of all available databases in SRS</a> |                    |         |       |           |             |
| Database                                                    | SRS status                                | Index date                                                    | Group Name (short) | Entries | Perm. | Std. View | Descr. File |
| <a href="#">bc_nature_tveer_2002_group_averages</a>         | ✓ <a href="#">Add</a> <a href="#">Del</a> | 3/3/05                                                        | MAD_BC             | 24482   |       | 7         |             |
| <a href="#">gsf_genomebiol_holterhus_dht_2003</a>           | ✓ <a href="#">Add</a> <a href="#">Del</a> | 25/11/04                                                      | MAD_GSF            | 42329   |       | 14        |             |
| <a href="#">holterhus_gsf_dht</a>                           | ✗ <a href="#">Add</a> <a href="#">Del</a> |                                                               |                    |         |       |           |             |
| <a href="#">metastases_nat_gen_ramaswamy_2003</a>           | ✓ <a href="#">Add</a> <a href="#">Del</a> | 17/4/05                                                       | MAD_CANCER_GENERAL | 2927    |       | 6         |             |
| <a href="#">nki_bc_summary</a>                              | ✗ <a href="#">Add</a> <a href="#">Del</a> |                                                               |                    |         |       |           |             |
| <a href="#">normal_tissue_genome_biol_shyam_2005_avr</a>    | ✓ <a href="#">Add</a> <a href="#">Del</a> | 1/4/05                                                        | MAD_NT             | 12478   |       | 39        |             |
| <a href="#">normal_tissue_genome_res_son_2005_avr</a>       | ✓ <a href="#">Add</a> <a href="#">Del</a> | 13/4/05                                                       | MAD_NT             | 21476   |       | 22        |             |
| <a href="#">pc_cancer_cell_singh_2002</a>                   | ✓ <a href="#">Add</a> <a href="#">Del</a> | 10/4/05                                                       | MAD_PC             | 12533   |       | 8         |             |
| <a href="#">pc_cancer_cell_singh_2002_ev_2lr_mean_ce...</a> | ✗ <a href="#">Add</a> <a href="#">Del</a> |                                                               |                    |         |       | 8         |             |
| <a href="#">pc_jenster_unigermv_2001</a>                    | ✓ <a href="#">Add</a> <a href="#">Del</a> | 22/3/05                                                       | MAD_JENSTER        | 9826    | 7     | 15        |             |
| <a href="#">pc_nature_dhana_2001</a>                        | ✓ <a href="#">Add</a> <a href="#">Del</a> | 20/1/05                                                       | MAD_PC             | 12954   |       | 7         |             |
| <a href="#">pc_oosterhoff_90min_12h_24h_72h_r1881_eg...</a> | ✓ <a href="#">Add</a> <a href="#">Del</a> | 10/12/04                                                      | MAD_BLOK           | 17986   | 4     | 20        |             |
| <a href="#">pc_oosterhoff_90min_12h_24h_72h_r1881_eg...</a> | ✓ <a href="#">Add</a> <a href="#">Del</a> | 10/12/04                                                      | MAD_BLOK           | 17986   | 4     |           |             |
| <a href="#">rat_230_to_hg_u133_plus_complex_affymetr...</a> | ✗ <a href="#">Add</a> <a href="#">Del</a> |                                                               |                    |         | 3     |           |             |
| <a href="#">sdm_vm_final</a>                                | ✓ <a href="#">Add</a> <a href="#">Del</a> | 8/3/05                                                        | MAD_JENSTER        | 18087   | 1     | 17        |             |
| <a href="#">sdm_vm_top5000</a>                              | ✗ <a href="#">Add</a> <a href="#">Del</a> |                                                               |                    |         | 1     | 12        |             |
| <a href="#">swissprot</a>                                   | ✓ <a href="#">Add</a> <a href="#">Del</a> | n/a                                                           | Sequence           | n/a     | 1     |           |             |

Figure 11: Manage databases

In this view, uploaded databases can be saved, viewed and changed (click on database name) and added or removed from SRS. Information on ongoing processes (such as being uploaded in SRS), number of entries, group name, permissions, standard view and description file are displayed.

# **Nomenclature rules Erasmus MC SRS users**

## **Database name (cell A1)**

### 1) published microarray databases

The database name for published microarray datasets should reference the disease or tissue, the journal, first author, and year of publication.

Examples:

PC\_PNAS\_LAPOINTE\_2004

BC\_NATURE\_TVEER\_2002

AML\_NEJM\_VALK\_2004

### 2) unpublished microarray databases

The database name for user-owned unpublished datasets should reference the disease or tissue and conditions and can include researcher's name, microarray platform and date/year.

Examples:

NKI\_H18K\_LNCaP\_2\_4\_6\_8\_R1881

PROSTATE\_ZONES\_18K\_oligo\_2003

### 3) Coupling files

Coupling files will generally be constructed and updated by the SRS administrator and have the format: microarray platform, subtype and "coupling".

Examples:

AFFYMETRIX\_U133A\_2\_COUPLING

NKB/NKI\_HUMAN\_18K\_cDNA\_COUPLING

## **Database group (cell A2)**

Any public microarray database should be deposited under the section:

["Microarray Databases – General – "subsection"](#)

User-owned microarray datasets should be deposited under the user's name:

["User owned Databases – User Name"](#)

Coupling files are uploaded in the ["Microarray Databases – Coupling Files"](#) section.

## **Descriptive column names (row #4)**

Column names, also referred to as "field names" include the standard field names and experiment names.



Standard column names should be kept to a specific nomenclature:

| Description              | Mandatory column name                   |
|--------------------------|-----------------------------------------|
| Unique SRS identifier    | ID (automatically generated by SRS)     |
| GenBank accession number | GenBank_Acc                             |
| UniGene cluster ID       | UniGene_Hs (or UniGene_Mm, etc.)        |
| Full gene name           | Gene_name                               |
| Gene symbol              | Gene_symbol                             |
| Omim ID                  | OMIM                                    |
| LocusLink ID             | LocusLink                               |
| RefSeq ID                | RefSeq                                  |
| SwissProt ID             | SwissProt                               |
| Affymetrix Probeset ID   | Affy_U95_Av2_ID or Affy_U133A2_ID, etc. |

Experiment column names should be as descriptive of the experiment as possible and **they MUST indicate the type of data**. Some examples:

LNCaP\_2h\_R1881\_2LR\_AVR

PC82\_Cas\_SD\_perc

Avoid non-descriptive phrases like: TEST\_1; Sample\_34; P13\_2

The different abbreviations representing the different types of data:

|                                            |                      |
|--------------------------------------------|----------------------|
| - expression values.....                   | _EV                  |
| - normalized.....                          | _EV                  |
| - raw data.....                            | _Raw_EV              |
| - Cy3 or Cy5.....                          | _CY3/5_EV            |
| - Affymetrix.....                          | _Aff_EV              |
| - background values or other.....          | _bckg_EV             |
| - averages                                 | _EV_AVR              |
| - averages of all arrays                   | _EV_AVR_ALL          |
| - 2log ratios.....                         | _2LR_                |
| - averages of arrays (e.g. dye swaps)...   | _2LR_AVR             |
| - averages of larger groups.....           | _2LR_GR_AVR          |
| - averages of all                          | _2LR_AVR_ALL         |
| - mean or median centered.....             | _2LR" _xx" _centered |
| - standard deviation or error.....         | _SD                  |
| - as percentage.....                       | _SD_perc             |
| - counts (e.g. # times flagged).....       | _count               |
| - as percentage                            | _count_perc          |
| - SAM or other statistical values.....     | _SAM                 |
| - yes or no statistically significant..... | _SAM_count           |
